# Supplementary material for: Ex situ cultivation protocol for Cystoseira amentacea var. stricta (Fucales, Phaeophyceae) from a restoration perspective
Source: PubMed Central journal article supplement (PMC5813978; doi:10.1371/journal.pone.0193011), 2018-02-15
Supplement: pone.0193011.s001.pdf [file pone.0193011.s001.pdf]

|                | df | SS      | MS      | F     | P               |
|----------------|----|---------|---------|-------|-----------------|
| Substratum (S) | 1  | 3020.75 | 3020.75 | 33.31 | <b>2.87e-05</b> |
| Condition (C)  | 3  | 334.16  | 111.39  | 1.23  | 0.33            |
| S:C            | 3  | 511.07  | 170.36  | 1.88  | 0.17            |
| Residual       | 16 | 1451.29 | 90.71   |       |                 |
