# Supplementary material for: Ex situ cultivation protocol for Cystoseira amentacea var. stricta (Fucales, Phaeophyceae) from a restoration perspective
Source: PubMed Central journal article supplement (PMC5813978; doi:10.1371/journal.pone.0193011), 2018-02-15
Supplement: pone.0193011.s002.pdf [file pone.0193011.s002.pdf]

|           | df | SS   | MS   | F     | R <sup>2</sup> | P                        |
|-----------|----|------|------|-------|----------------|--------------------------|
| Condition | 3  | 2.80 | 0.93 | 34.23 | 0.65           | <b>0.001<sup>a</sup></b> |
| Residual  | 56 | 1.52 | 0.03 |       | 0.35           |                          |
| Total     | 59 | 4.32 |      |       | 1.00           |                          |
