# Supplementary material for: Ex situ cultivation protocol for Cystoseira amentacea var. stricta (Fucales, Phaeophyceae) from a restoration perspective
Source: PubMed Central journal article supplement (PMC5813978; doi:10.1371/journal.pone.0193011), 2018-02-15
Supplement: pone.0193011.s003.pdf [file pone.0193011.s003.pdf]

| Week 1         | df  | SS     | MS      | F     | P                          |
|----------------|-----|--------|---------|-------|----------------------------|
| Density        | 1   | 1702.2 | 1702.17 | 29.62 | <b>3.18e<sup>-07</sup></b> |
| Substratum (S) | 1   | 274.9  | 274.91  | 4.78  | <b>0.03</b>                |
| Condition (C)  | 3   | 8404.3 | 2801.43 | 48.74 | <b>2.2e<sup>-16a</sup></b> |
| S:C            | 3   | 367.0  | 122.34  | 2.13  | 0.10                       |
| Residuals      | 111 | 6379.9 | 57.48   |       |                            |
