# Supplementary material for: Ex situ cultivation protocol for Cystoseira amentacea var. stricta (Fucales, Phaeophyceae) from a restoration perspective
Source: PubMed Central journal article supplement (PMC5813978; doi:10.1371/journal.pone.0193011), 2018-02-15
Supplement: pone.0193011.s004.pdf [file pone.0193011.s004.pdf]

| Week 2         | df  | SS      | MS     | F      | P                          |
|----------------|-----|---------|--------|--------|----------------------------|
| Density        | 1   | 2321.5  | 2321.5 | 48.11  | <b>2.83e<sup>-10</sup></b> |
| Substratum (S) | 1   | 192.7   | 192.7  | 3.99   | 0.05                       |
| Condition (C)  | 3   | 17125.8 | 5708.6 | 118.29 | 2.2e <sup>-16</sup>        |
| S:C            | 3   | 898.5   | 299.5  | 6.21   | <b>0.0006<sup>ab</sup></b> |
| Residuals      | 111 | 5356.8  | 48.3   |        |                            |
