# Supplementary material for: Ex situ cultivation protocol for Cystoseira amentacea var. stricta (Fucales, Phaeophyceae) from a restoration perspective
Source: PubMed Central journal article supplement (PMC5813978; doi:10.1371/journal.pone.0193011), 2018-02-15
Supplement: pone.0193011.s005.pdf [file pone.0193011.s005.pdf]

|                | df | SS   | MS    | F     | R <sup>2</sup> | P                        |
|----------------|----|------|-------|-------|----------------|--------------------------|
| Substratum (S) | 1  | 0.01 | 0.002 | 0.51  | 0.01           | 0.47                     |
| Condition (C)  | 3  | 0.16 | 0.05  | 12.30 | 0.71           | <b>0.001<sup>a</sup></b> |
| S:C            | 2  | 0.01 | 0.004 | 0.98  | 0.04           | 0.40                     |
| Residual       | 13 | 0.06 | 0.004 |       | 0.25           |                          |
| Total          | 19 | 0.22 |       |       | 1.00           |                          |
